# Supplementary material for: A High Percentage of CD16+ Monocytes Correlates with the Extent of Bone Erosion in Chronic Lymphocytic Leukemia Patients: The Impact of Leukemic B Cells in Monocyte Differentiation and Osteoclast Maturation
Source: MDPI journal article supplement (doi:10.3390/cancers14235979), 2022-12-03
Supplement: s1 [file s1]

## Supplementary Table S1

| CASE N. | STAGE<br>(BINET) | IgHV  | CD38 |
|---------|------------------|-------|------|
| N.1     | A                | MUT   | neg  |
| N.2     | A                | MUT   | neg  |
| N.3     | B                | MUT   | neg  |
| N.4     | C                | UNMUT | pos  |
| N.5     | B                | MUT   | pos  |
| N.6     | A                | MUT   | pos  |
| N.7     | A                | MUT   | neg  |
| N.8     | A                | UNMUT | nd   |
| N.9     | A                | UNMUT | nd   |
| N.10    | A                | UNMUT | nd   |
| N.11    | A                | UNMUT | pos  |
| N.12    | A                | UNMUT | pos  |
| N.13    | B                | MUT   | neg  |
| N.14    | B                | MUT   | pos  |
| N.15    | B                | MUT   | neg  |
| N.16    | B                | UNMUT | pos  |
| N.17    | C                | MUT   | neg  |
| N.18    | C                | UNMUT | neg  |
| N.19    | C                | MUT   | pos  |
| N.20    | C                | MUT   | neg  |
| N.21    | B                | UNMUT | neg  |
| N.22    | A                | UNMUT | nd   |
| N.23    | C                | UNMUT | nd   |
| N.24    | B                | UNMUT | neg  |
| N.25    | A                | UNMUT | pos  |
| N.26    | A                | MUT   | neg  |
| N.27    | B                | MUT   | pos  |
| N.28    | A                | MUT   | pos  |
| N.29    | nd               | MUT   | pos  |
| N.30    | A                | UNMUT | pos  |
| N.31    | A                | MUT   | pos  |
| N.32    | A                | UNMUT | nd   |
| N.33    | A                | MUT   | pos  |
| N.34    | A                | UNMUT | pos  |
| N.35    | C                | UNMUT | pos  |
| N.36    | C                | UNMUT | nd   |
| N.37    | C                | MUT   | pos  |
